# Supplementary material
Source: publisher site journal article supplement (https://www.dovepress.com/article/488632)
Supplement: Supplementary file 1 [file get_supplementary_file.php]

**Supplementary Data**

| 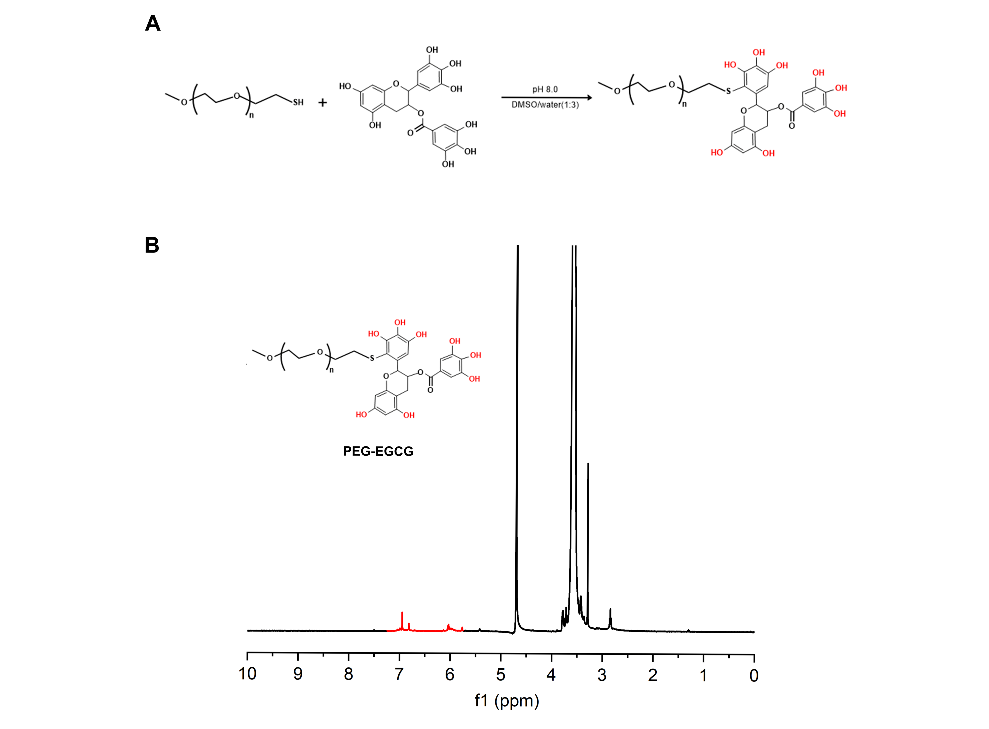 |
| --- |
| **Fig. S1.** Characterization of PEG-EGCG. (A) Synthetic route of PEG-EGCG. (B) 1H-NMR of PEG-EGCG. |

| 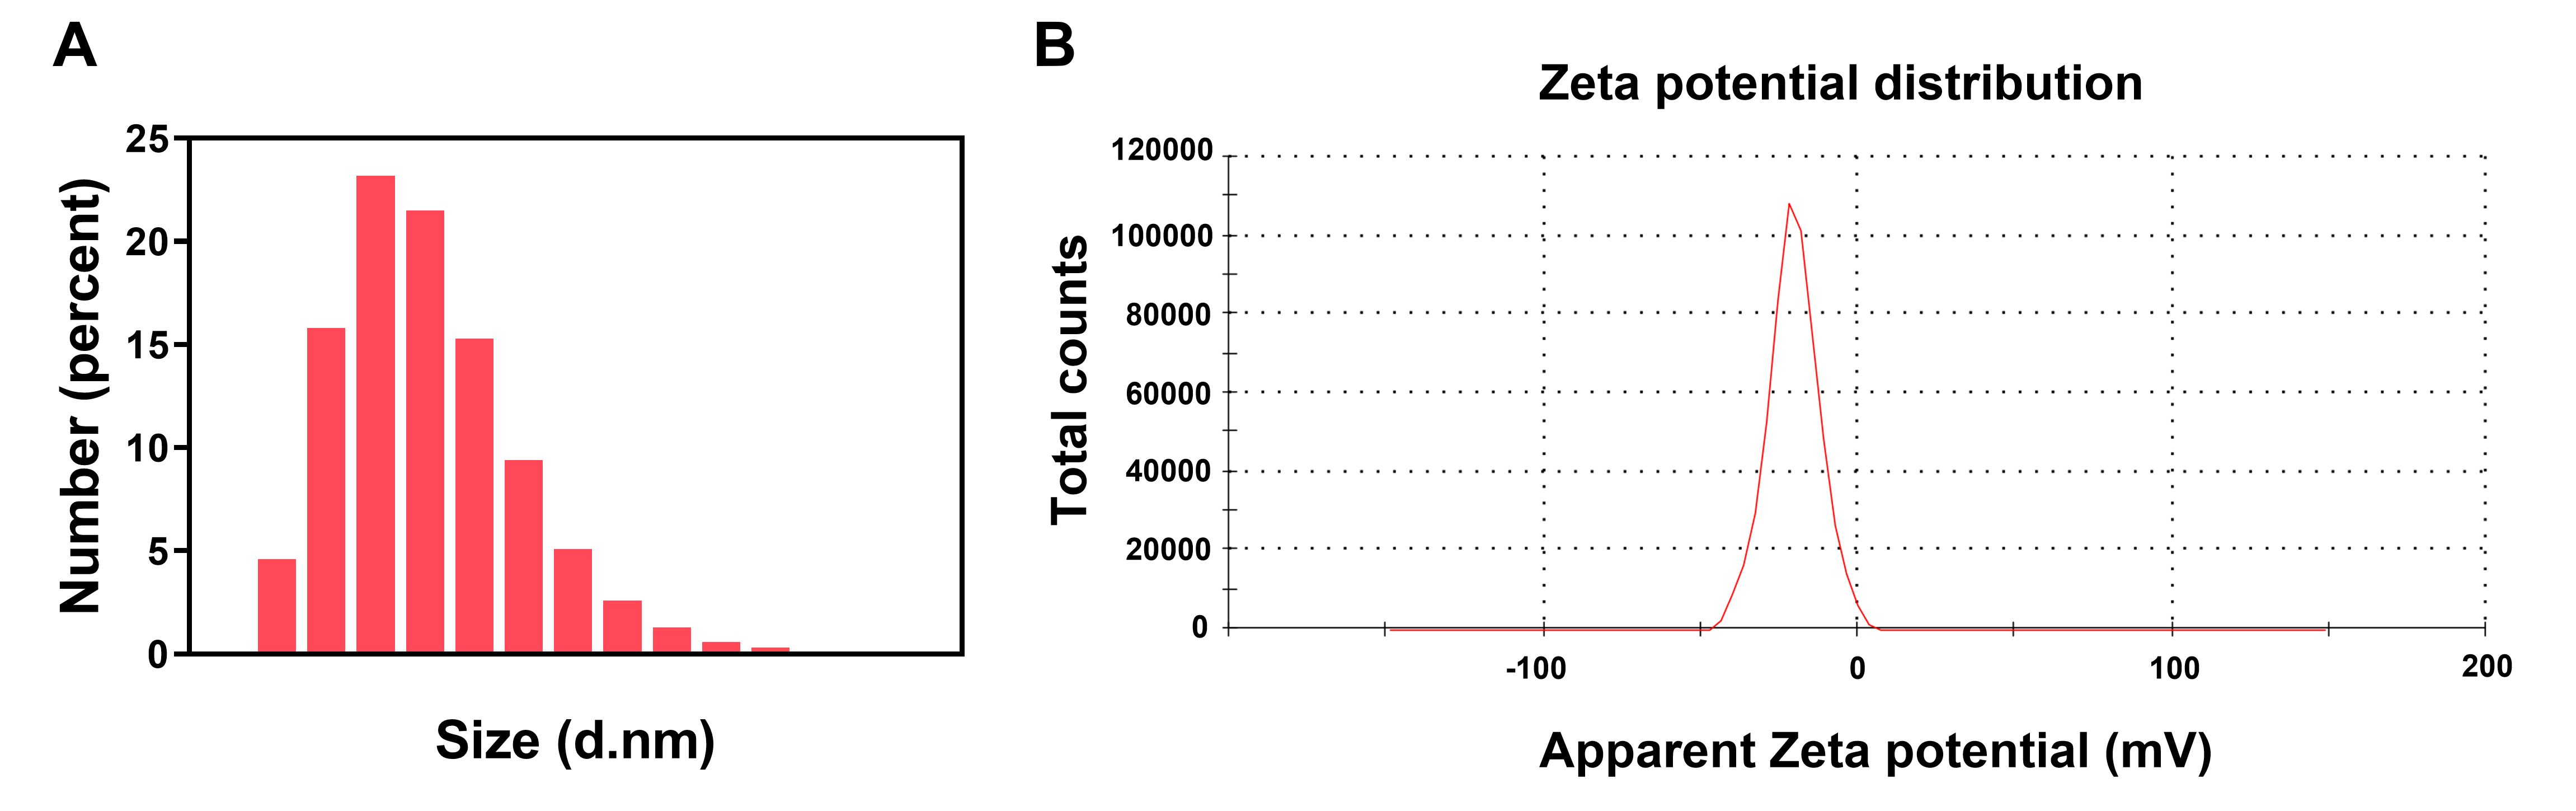 |
| --- |
| **Fig. S2.** Characterization of EGCG NPs. (A) DLS spectroscopy of EGCG NPs. (B) Zeta potential distribution of EGCG NPs. |

| 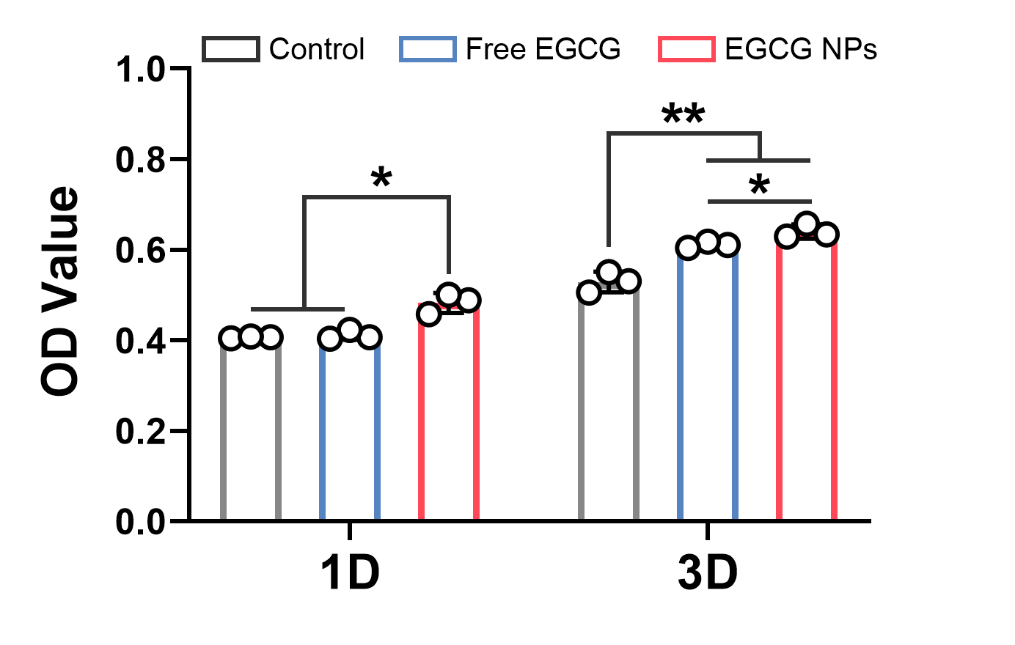 |
| --- |
| **Fig. S3.** CCK-8 assay of NIH/3T3 cells co-cultured with different drugs. Significance leveles of *p<0.05 and **p<0.01 were applied. |
